# Supplementary material for: A clinical-genetic approach to assessing cardiovascular risk in patients with CKD
Source: PubMed Central journal article supplement — Clin Kidney J. 2017 Jun 22;10(5):672–8. doi: 10.1093/ckj/sfx039 (PMC5622901; doi:10.1093/ckj/sfx039), 2017-06-22
Supplement: sfx039_Supp.pdf [file sfx039_Supp.pdf]

Supplementary Table 1.- Genetic variants included in each genetic risk score (GRS): A) percentage of patients with missing information for each genetic variant; B) p value for departure from Hardy-Weinberg equilibrium.

A) Percentage of patients with missing information for each genetic variant

| Patients (N)         | GRS-1             |                               | GRS-2             |                               |
|----------------------|-------------------|-------------------------------|-------------------|-------------------------------|
|                      | Variants included | Patient with missing data (%) | Variants included | Patient with missing data (%) |
|                      |                   | 632                           |                   | 597                           |
| Genetic variant (rs) |                   |                               |                   |                               |
| 10455872             | X                 | 9.7                           |                   |                               |
| 12526453             | X                 | 3                             | X                 | 3                             |
| 1333049              | X                 | 2.8                           | X                 | 2.8                           |
| 17465637             | X                 | 3                             | X                 | 3                             |
| 501120               | X                 | 3.2                           | X                 | 3.2                           |
| 6725887              | X                 | 2.8                           | X                 | 2.8                           |
| 9818870              | X                 | 3.2                           | X                 | 3.2                           |
| 9982601              | X                 | 2.8                           | X                 | 2.8                           |
| 10507391             | X                 | 9.7                           |                   |                               |
| 17222842             | X                 | 9.5                           |                   |                               |
| 9315051              | X                 | 9.7                           |                   |                               |

B) p value for departure from Hardy-Weinberg equilibrium.

| Hardy Weinberg equilibrium |         |
|----------------------------|---------|
| Genetic variant (rs)       | P value |
| 10455872                   | 1.000   |
| 12526453                   | 0.798   |
| 1333049                    | 0.241   |
| 17465637                   | 1.000   |
| 501120                     | 0.852   |
| 6725887                    | 0.514   |
| 9818870                    | 0.478   |
| 9982601                    | 0.152   |
| 10507391                   | 0.386   |
| 17222842                   | 0.017   |
| 9315051                    | 0.615   |
